# Supplementary material
Source: Research Square preprint supplement (doi:10.21203/rs.3.rs-9245646/v1)
Supplement: Supplementary file 1 [file 149ccef10054b9b678831722.docx]

# Supplementary Figure Legends

**Supplementary Figure S1.** Top cascade pairs for ibm_fez. Qubit pairs with the largest absolute correlation change between early and late temporal windows, ranked by |delta_r|.

**Supplementary Figure S2.** Qubit-level cascade participation for ibm_fez. Each bar shows the number of cascade pairs in which a given qubit participates, revealing concentration of architecture reorganisation in a subset of qubits.

**Supplementary Figure S3.** Individual metric trends versus WJ cascade participation for ibm_fez. Scatter plots show per-qubit linear trends in each calibration metric against cascade pair count. Weak, non-significant correlations confirm that WJ detects architecture change beyond individual parameter drift.

**Supplementary Figure S4.** Top cascade pairs for ibm_torino. Same analysis as Supplementary Fig. S1.

**Supplementary Figure S5.** Qubit-level cascade participation for ibm_torino. Same analysis as Supplementary Fig. S2.

**Supplementary Figure S6.** Correlation matrix comparison for ibm_torino. Left: average early-window matrix. Centre: average late-window matrix. Right: difference matrix.

**Supplementary Figure S7.** Dissociation of WJ cascade participation from conventional degradation indicators for ibm_torino. Same analysis as Fig. 5.

**Supplementary Figure S8.** Top cascade pairs for ibm_marrakesh. Same analysis as Supplementary Fig. S1.

**Supplementary Figure S9.** Qubit-level cascade participation for ibm_marrakesh. Same analysis as Supplementary Fig. S2.

**Supplementary Figure S10.** Correlation matrix comparison for ibm_marrakesh. Left: average early-window matrix. Centre: average late-window matrix. Right: difference matrix.

**Supplementary Figure S11.** Dissociation of WJ cascade participation from conventional degradation indicators for ibm_marrakesh. Same analysis as Fig. 5.
